# Supplementary material for: Live attenuated influenza vaccine for children with egg allergy
Source: HighWire-hosted journal article supplement (doi:10.1136/bmj.h6656), 2015-12-09
Supplement: bmj.h6656.pdf [file bmj.h6656.pdf]

# 鸡蛋过敏的儿童接种流感减毒活疫苗

在获得新的令人信服的安全性新证据后,应改变政策并允许接种疫苗

## Live attenuated influenza vaccine for children with egg allergy

Policies should change to allow vaccination, after compelling new evidence of safety

来源:BMJ 2015;351:h6656 doi: 10.1136/bmj.h6656

流感疫苗是由鸡蛋衍生而来的,而且一直禁用于鸡蛋过敏人群。它含有低残留水平的鸡蛋卵清蛋白,对于鸡蛋过敏的人群,理论上发生过敏反应的风险<sup>1</sup>。然而,没有研究表明残留的卵清蛋白含量能导致不良事件(包括过敏反应相关的发病率和病死率),以及对鸡蛋过敏的接种者或鸡蛋过敏人群接种疫苗的风险高于一般人群<sup>2</sup>。众多变态反应专家通过疫苗的皮肤过敏试验、疫苗脱敏剂来降低疫苗中卵清蛋白浓度(<1.2 μg/ml)来规避接种风险。但是每年政府机构和疫苗制造商依旧将其作为接种时的禁忌<sup>2-3</sup>。

由于该禁忌证而导致的感染风险是巨大的。从1976—2006年,流感感染造成了49 000人死亡,在美国,每年有294 128人因流感而住院(包括21 156名5岁以下儿童)<sup>4,5</sup>。鸡蛋过敏影响了约2%~6%儿童。三分之一对鸡蛋过敏的儿童有哮喘,使得对鸡蛋过敏的儿童没有得到疫苗的保护,成为高风险流感相关并发症的易感人群<sup>6-7</sup>。

2012年,经多次研究显示注射型流感疫苗对于鸡蛋过敏的接种者是安全的,美国疾病控制和预防中心(CDC)对其接种禁忌进行了修正。现在CDC建议那些对鸡蛋轻度过敏的人群可以接种注射型流感病毒疫苗,而那些对鸡蛋严重过敏人群在接种疫苗前需咨询变态反应专家<sup>8</sup>。尽管流感疫苗中仅含有最低浓度的卵清

蛋白(<0.2 μg/ml),但由于缺乏安全性证据,鸡蛋过敏仍然是流感减毒活疫苗的接种禁忌证<sup>9</sup>。对于幼儿,鼻内接种流感减毒活疫苗比血管内注射是更好的选择<sup>9</sup>。没有证据表明,减毒活流感疫苗增加鸡蛋过敏者的过敏反应风险,但研究有限,并且安全性数据不足。

在一篇相关文章中,Turner和他的同事填补了这一重要空白(doi:10.1136/bmj.h6291)<sup>10</sup>。779名对鸡蛋过敏的儿童在接种流感减毒活疫苗后是安全的,包括了35%对鸡蛋严重过敏的儿童和57%哮喘或反复喘息发作的儿童。尽管是一个相对较小的样本,作者得出的结论具有95%可信度:在鸡蛋过敏儿童中真正发生全身性过敏反应的低于0.5%。在接种疫苗的儿童中没有发生全身性过敏反应,仅1.2%(n=9)发生轻微的鼻咽部局部反应。这些都是非常重要的发现,能大幅改善这些高危儿童群的医疗保健。

在建立疫苗安全性和改变医疗保健政策的时候,我们是否应该为明确的风险和最终的安全性设定标准?鉴于缺乏数据证明其实际风险,支持阻止鸡蛋过敏儿童接种流感疫苗的观点一直是不可靠的。可论证的是,这些儿童因流感并发症造成的伤害远大于接种流感疫苗引起的过敏反应<sup>4,5</sup>。目前的情况是启用政策手段,来防止一个未经证实的理论风险,导致未能保护儿童避免真正的、更大的风

Matthew Greenhawt  
assistant professor of  
pediatrics  
Allergy Section,  
Children's Hospital  
Colorado, University  
of Colorado Denver  
School of Medicine,  
Aurora, CO 80045,  
USA

张伟令 译  
首都医科大学附属  
北京同仁医院儿科  
杜忠东 校  
首都医科大学附属  
北京儿童医院
